# Supplementary material for: Palladium–nickel catalysts based on ordered titanium dioxide nanorod arrays with high catalytic peformance for formic acid electro-oxidation
Source: Royal Society of Chemistry journal article supplement (doi:10.1039/c7ra00194k), 2017-01-01
Supplement: c7ra00194k1.pdf [file c7ra00194k1.pdf]

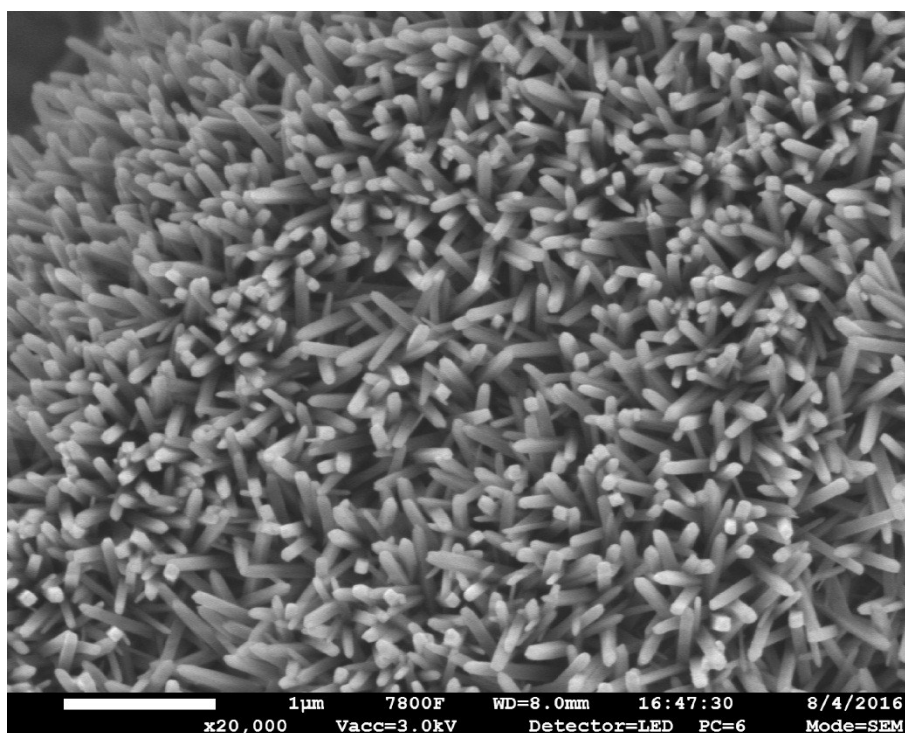

Fig. S1 FESEM image of TiO<sub>2</sub> NRs on a carbon paper

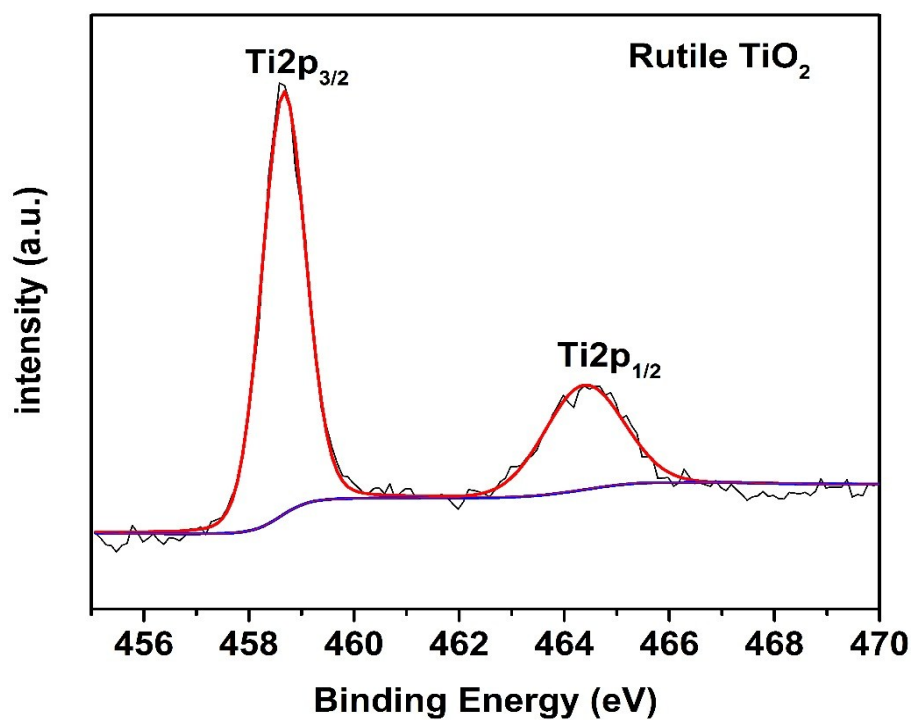

Fig. S2 Ti 2p XPS spectrum of rutile TiO<sub>2</sub>.

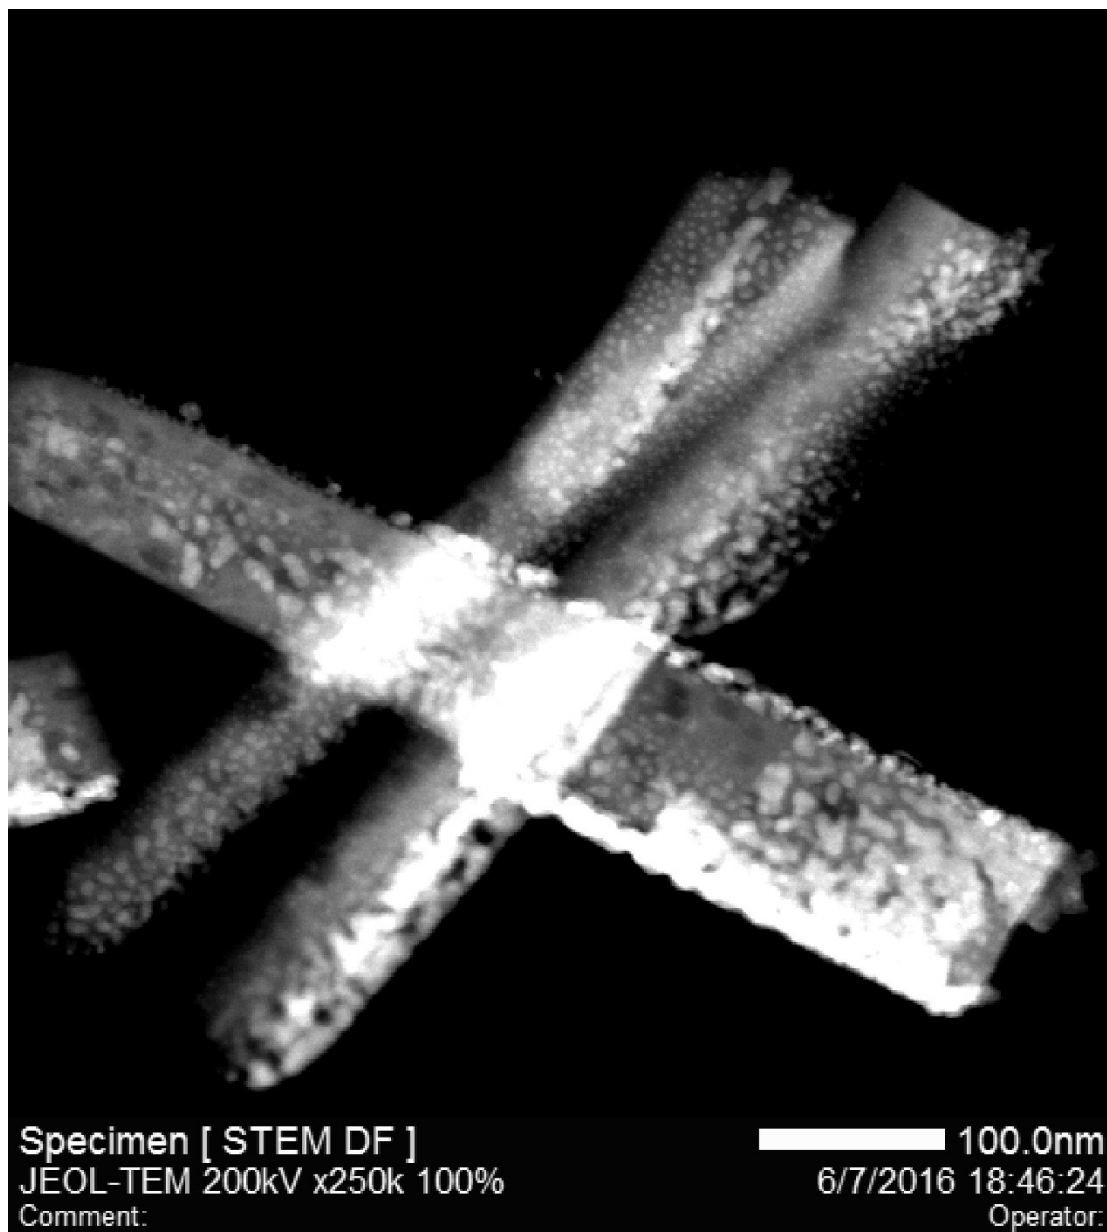

Fig. S3 STEM of PdNi nanoparticles on a TiO<sub>2</sub> nanorods

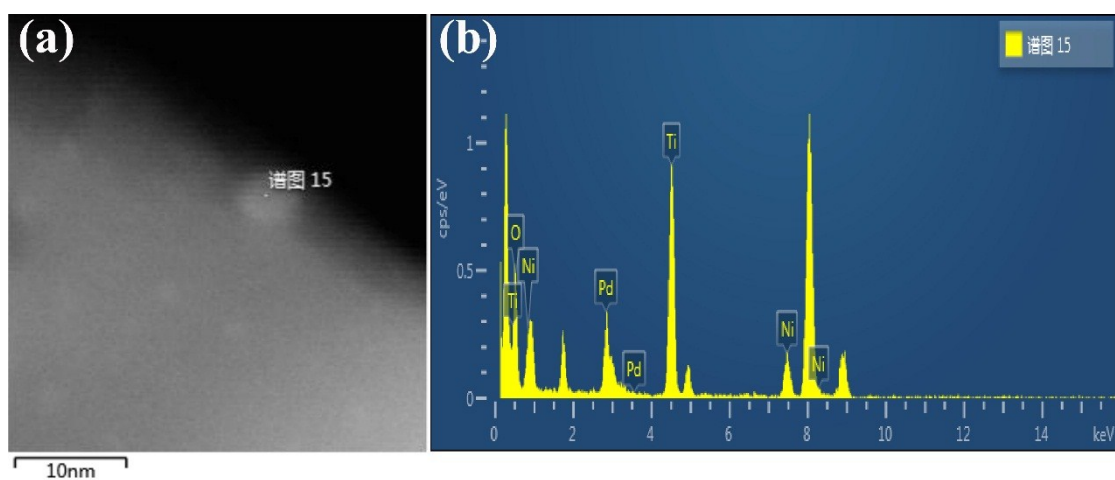

Fig. S4 STEM image (a), and EDX spectrum (b) of the PdNi-TiO<sub>2</sub> NRs

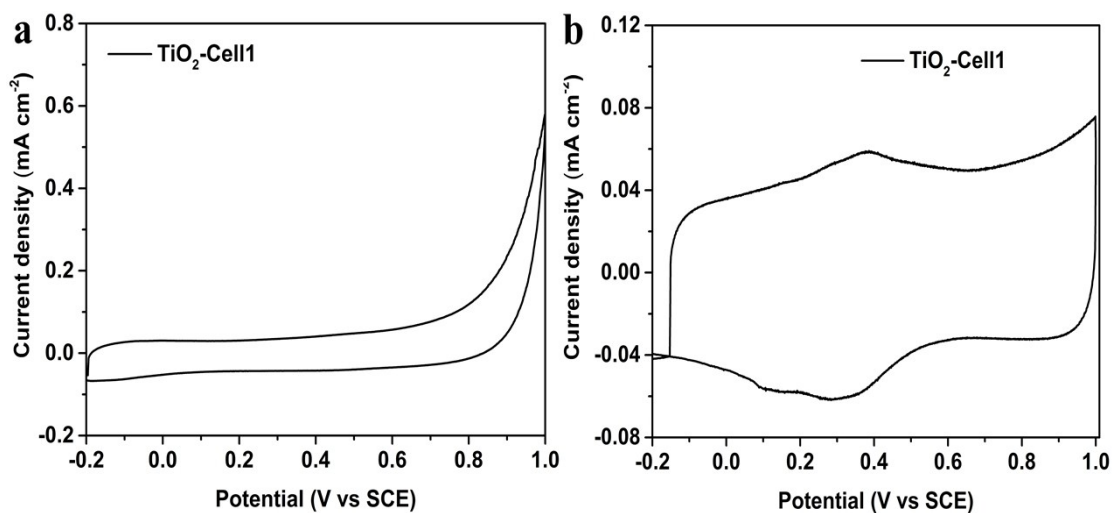

Fig. S5 CVs of  $\text{TiO}_2$  sample in 0.5 M  $\text{H}_2\text{SO}_4$  (a) and 0.5 M  $\text{H}_2\text{SO}_4$  containing 0.5 M  $\text{HCOOH}$  at the scan rate of  $50 \text{ mV s}^{-1}$ .

Table S1 Comparison of the mass activity of the Pd<sub>2</sub>Ni<sub>3</sub>-TiO<sub>2</sub> with previous reported Pd-based catalysts.

| Samples                                           | Test conditions                                                                 | ECSA (m <sup>2</sup> g <sup>-1</sup> <sub>Pd</sub> ) | Mass activity (mA mg <sup>-1</sup> <sub>Pd</sub> ) | Ref.              |
|---------------------------------------------------|---------------------------------------------------------------------------------|------------------------------------------------------|----------------------------------------------------|-------------------|
| Pd <sub>2</sub> Ni <sub>3</sub> -TiO <sub>2</sub> | 0.5 M H <sub>2</sub> SO <sub>4</sub><br>+ 0.5 M HCOOH;<br>50 mV s <sup>-1</sup> | 43.6                                                 | 753.1                                              | This work         |
| Pd/NS-G                                           | 0.5 M H <sub>2</sub> SO <sub>4</sub><br>+ 0.5 M HCOOH;<br>50 mV s <sup>-1</sup> | 83.4                                                 | 501.8                                              | S1 <sup>1</sup>   |
| Pd <sub>6</sub> Co/3DG                            | 0.5 M H <sub>2</sub> SO <sub>4</sub><br>+ 0.5 M HCOOH;<br>50 mV s <sup>-1</sup> | 51.0                                                 | 430.8                                              | S2 <sup>2</sup>   |
| PdNi/C                                            | 0.5 M H <sub>2</sub> SO <sub>4</sub><br>+ 0.5 M HCOOH;<br>50 mV s <sup>-1</sup> | ---                                                  | 556.7                                              | S3 <sup>3</sup>   |
| PdNi/C                                            | 0.5 M H <sub>2</sub> SO <sub>4</sub><br>+ 0.5 M HCOOH;<br>50 mV s <sup>-1</sup> | ---                                                  | 396                                                | S4 <sup>4</sup>   |
| PdCu/C                                            | 0.5 M H <sub>2</sub> SO <sub>4</sub><br>+ 0.5 M HCOOH;<br>50 mV s <sup>-1</sup> | ---                                                  | 654                                                | S4 <sup>4</sup>   |
| Pd@graphene                                       | 0.5 M H <sub>2</sub> SO <sub>4</sub><br>+ 0.5 M HCOOH;<br>50 mV s <sup>-1</sup> | 56.0                                                 | 89.5                                               | S5 <sup>5</sup>   |
| Porous Pd <sub>57</sub> Ni <sub>43</sub>          | 0.5 M H <sub>2</sub> SO <sub>4</sub><br>+ 0.5 M HCOOH;<br>50 mV s <sup>-1</sup> | 58.4 mC mg <sup>-1</sup>                             | ~800                                               | S6 <sup>6</sup>   |
| Pd-NF/C                                           | 0.5 M H <sub>2</sub> SO <sub>4</sub><br>+ 0.5 M HCOOH;<br>20 mV s <sup>-1</sup> | 2.47                                                 | 16.4                                               | S7 <sup>7</sup>   |
| Pd <sub>1</sub> Ni <sub>1</sub> -NNs/RGO          | 0.5 M H <sub>2</sub> SO <sub>4</sub><br>+ 0.5 M HCOOH;<br>50 mV s <sup>-1</sup> | 98.2                                                 | 604.3                                              | S8 <sup>8</sup>   |
| AP - Pd/GN                                        | 0.5 M H <sub>2</sub> SO <sub>4</sub><br>+ 0.5 M HCOOH;<br>50 mV s <sup>-1</sup> | 72.72                                                | 446.3                                              | S9 <sup>9</sup>   |
| Pd-DNA@Graphene                                   | 0.5 M H <sub>2</sub> SO <sub>4</sub><br>+ 0.5 M HCOOH;<br>50 mV s <sup>-1</sup> | 147.1                                                | 140.1                                              | S10 <sup>10</sup> |

## References:

[]

- 1 X. Zhang, J. Zhu, C. S. Tiwary, Z. Ma, H. Huang, J. Zhang, Z. Lu, W. Huang and Y. Wu, *ACS Appl. Mater. Interfaces*, 2016, **8**, 10858-10865.
- 2 L. Y. Zhang, Z. L. Zhao, W. Yuan and C. M. Li, *Nanoscale*, 2016, **8**, 1905-1909.
- 3 W. Wang, S. Ji, H. Wang and R. Wang, *Fuel Cells*, 2016, **6**, 1129-1133.
- 4 S. Hu, F. Munoz, J. Noborikawa, J. Haan, L. Scudiero and S. Ha, *Appl. Catal. B-environ*, 2016, **180**, 758-765.
- 5 L. YingZhang, ZhiLiangZhao and ChangMingLi, *Nano Energy*, 2015, **11**, 71-77.
- 6 C. Du, M. Chen, W. Wang and G. Yin, *ACS Appl. Mater. Interfaces*, 2011, **3**, 105-109.
- 7 B. Zhang, H. Peng, L. Yang, H. Li, H. Nan, Z. Liang, H. Song, H. Su, C. Li and S. Liao, *J. Mater. Chem. A*, 2015, **3**, 973-977.
- 8 D. Bin, B. B. Yang, F. F. Ren, K. Zhang, P. Yang and Y. K. Du, *J. Mater. Chem. A*, 2015, **3**, 14001-14006.
- 9 H. Zhao, J. Yang, L. Wang, C. Tian, B. Jiang and H. Fu, *Chem. Commun.*, 2011, **47**, 2014-2016.
- 10 C. X. Guo, L. Y. Zhang, J. Miao, J. Zhang and C. M. Li, *Advanced Energy Materials*, 2013, **3**, 167-171.
